# Supplementary material
Source: PubMed Central journal article supplement (PMC7706890)
Supplement: ry200302suppa1.pdf [file ry200302suppa1.pdf]

**Table E1. Number of nodules with same LungRADS classifications for all readers with volumetric and linear measurements, and nodules in which the LungRADS classification was different with one of the measurement methods for at least one reader. (a) Manual diameter versus volumetry (b) Semiautomated diameter versus volumetry. See Tables 5 and E2 for kappa values.**

**a. Manual diameter versus volumetry**

|                             | LungRADS by volumetry |    |    |    |
|-----------------------------|-----------------------|----|----|----|
| LungRADS by manual diameter | 2                     | 3  | 4A | 4B |
| 2                           | 56                    | 1  | 0  | 0  |
| 3                           | 27                    | 7  | 3  | 0  |
| 4A                          | 0                     | 12 | 8  | 0  |
| 4B                          | 0                     | 0  | 4  | 7  |

**b. Semiautomated diameter versus volumetry**

|                                    | LungRADS by volumetry |    |    |    |
|------------------------------------|-----------------------|----|----|----|
| LungRADS by semiautomated diameter | 2                     | 3  | 4A | 4B |
| 2                                  | 59                    | 0  | 0  | 0  |
| 3                                  | 24                    | 9  | 0  | 0  |
| 4A                                 | 0                     | 12 | 14 | 0  |
| 4B                                 | 0                     | 0  | 1  | 7  |

Note: Comparison is for the 126 nodules measured by all readers with all methods. All nodules except two were given the same Lung-RADS classification with volumetry by all three readers. Total count of 125 in (a) reflects exclusion of one nodule classified manually as Lung-RADS 4A by two readers and 3 by one reader, and by volumetry as Lung-RADS 3 by two readers and 4A by one reader. Kappa values corresponding to this data are given in Table 5.

**Table E2. Kappa (95% confidence limits) for agreement on classification into Lung-RADS categories 2 versus category 3 versus combined categories 4A/4B.**

|              | Manual diameter   | Auto-diameter     | Auto-volume       |
|--------------|-------------------|-------------------|-------------------|
| R1 versus R2 | 0.85 (0.78, 0.92) | 0.96 (0.93, 1.00) | 0.98 (0.95, 1.00) |
| R2 versus R3 | 0.80 (0.72, 0.88) | 0.94 (0.89, 0.98) | 1.00 (1.00, 1.00) |
| R1 versus R3 | 0.83 (0.76, 90)   | 0.97 (0.94, 1.00) | 0.98 (0.95, 1.00) |

R1, R2, R3—Readers 1, 2, and 3.
